# Supplementary material
Source: MDPI journal article supplement (https://www.mdpi.com/2076-3417/12/5/2331)
Supplement: s1 [file s1]

Article

# Seismological and Ground Deformation Study of the Ionian Islands (W. Greece) During 2014-2018, a Period of Intense Seismic Activity

Vassilis Sakkas, Vasilis Kapetanidis, George Kaviris, Ioannis Spingos, Spyridon Mavroulis, Michalis Diakakis, John D. Alexopoulos, Danai Kazantzidou-Firtinidou, Ioannis Kassaras, Spyridon Dilalos, Emmanuel Vassilakis, Evelina Kotsi, G.-Akis Tselentis, Efthymios Lekkas and Nicholas Voulgaris

## Supplementary Section

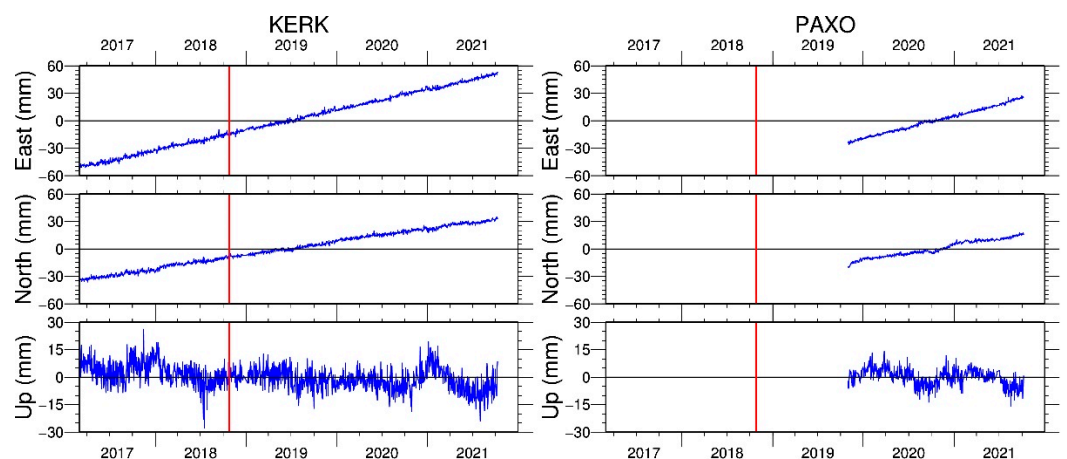

**Figure S1.** Time series for station Kerk on Corfu Island, and PAXO on Paxoi Island. Red lines mark the dates of the Cephalonia, Lefkada and Zakynthos earthquakes.

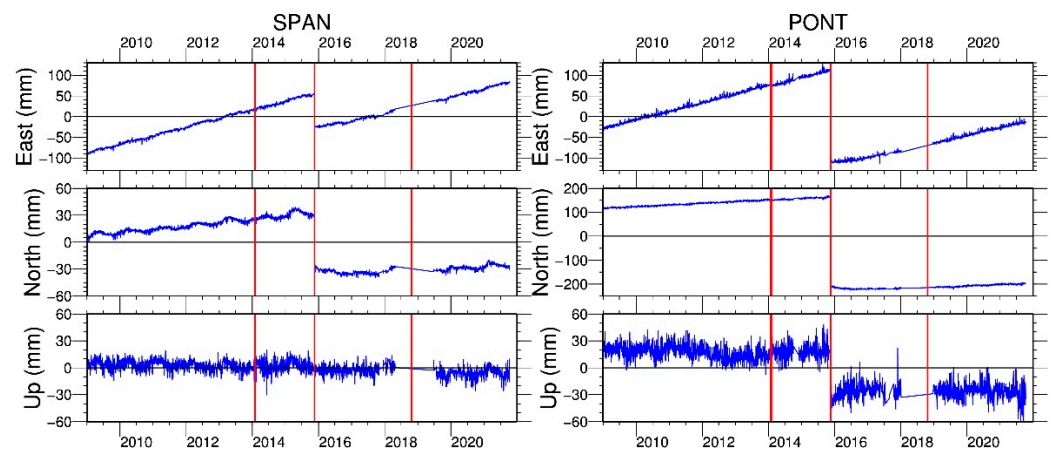

**Figure S2.** Time series for station SPAN and PONT on the northern and southern part of Lefkada, respectively.

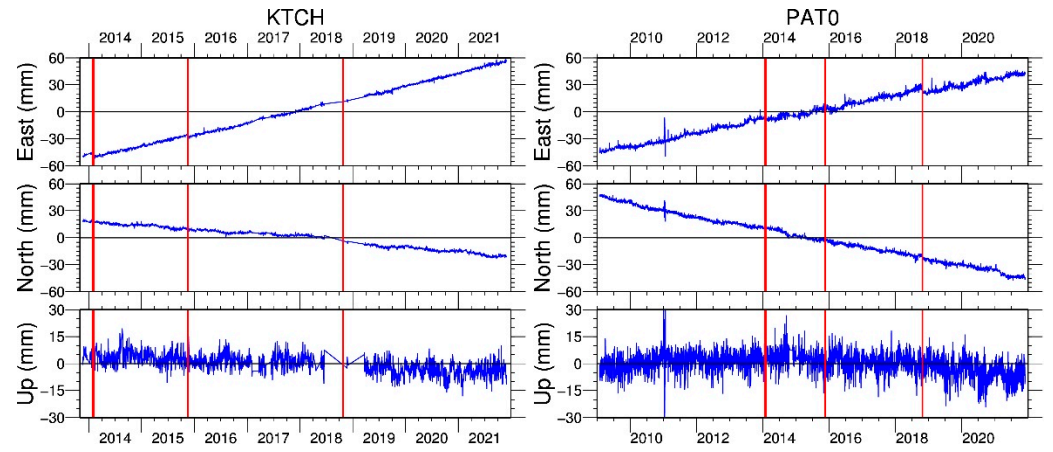

**Figure S3.** Time series for station KTCH in Western Greece and PAT0 on the NW Peloponnese, in the city of Patras.
